# Supplementary material
Source: publisher site journal article supplement (https://www.dovepress.com/article/315314)
Supplement: Supplementary file 1 [file get_supplementary_file.php]

## Supplementary material: References

1. Bouchagiar G. The Long Road Toward Tracking the Trackers and De-biasing: A Consensus on Shaking the Black Box and Freeing from Bias. *Review of European Studies*, Canadian Center of Science and Education.2019; 11(1):1-27
2. Chatterjee S. Is data privacy a fundamental right in India? An analysis and recommendations from policy and legal perspective. *International Journal of Law and Management*.2019, 61 (1):170-190. <https://doi.org/10.1108/IJLMA-01-2018-0013>
3. Citron DK. *Sexual Privacy*, *Yale Law Journal*. 2019,128 : 1870-1960  
<https://digitalcommons.law.yale.edu/ylij/vol128/is>
4. Colin JP A. The Robot Koseki: A Japanese Law Model for Regulating Autonomous Machines. *Journal of Business & Technology Law*. 2019;14(2):403-468
5. Crofts T, Kirchengast T. A Ladder Approach to Criminalising Revenge Pornography. *The Journal of Criminal Law*. 2019; 83(1):87-103. doi:[10.1177/0022018318814361](https://doi.org/10.1177/0022018318814361)
6. Davies S. Artificial Intelligence in Global Health. *Ethics & International Affairs*, 2019; 33(2), 181-192. doi:10.1017/S0892679419000157
7. Diamond, L. The Road to Digital Unfreedom: The Threat of Postmodern Totalitarianism. *Journal of Democracy* .2019; 30(1): 20-24. doi:[10.1353/jod.2019.0001](https://doi.org/10.1353/jod.2019.0001).
8. Donahoe E, MacDuffee MM. Artificial Intelligence and Human Rights. *Journal of Democracy*. 2019; 30(2): 115–26.
9. Feldstein S. The Road to Digital Unfreedom: How Artificial Intelligence is Reshaping Repression. *Journal of Democracy*. 2019; 30(1), 40-52. doi:[10.1353/jod.2019.0003](https://doi.org/10.1353/jod.2019.0003).
10. Gaon A, Stedman I. A Call to Action: Moving Forward with the Governance of Artificial Intelligence in Canada. *Alberta law review*. 2019;56(4):1137-1166
11. Gerards J. The fundamental rights challenges of algorithms. *Netherlands Quarterly of Human Rights*. 2019; 37(3):205-209. doi:[10.1177/0924051919861773](https://doi.org/10.1177/0924051919861773)
12. Greenberg D. Lions and Librarians: A Plea for the Intelligent Conservation of an Unnecessarily Endangered Species. *Legal Information Management*.2019; 19(2): 88-91.  
[doi:10.1017/S1472669619000197](https://doi.org/10.1017/S1472669619000197)
13. Grimm DJ. The Dark Data Quandary. *The American University law Review*. 2019;68(3):761-821.
14. He J, Baxter S, Xu J, et al. The practical implementation of artificial intelligence technologies in medicine. *Nat Med* 2019; 25:30–36. <https://doi.org/10.1038/s41591-018-0307-0>
15. Houser K. Can AI Solve the Diversity Problem in the Tech Industry? Mitigating Noise and Bias in Employment Decision-Making. *Stan Tech L.Rev*. 2019;22:290-354
16. Jackson BW. Artificial Intelligence and the Fog of Innovation: A Deep-Dive on Governance and the Liability of Autonomous Systems. *Santa Clara High Technology Law Journal*.2019;35 (4):35-63
17. Karl M M, Kaplan L. Artificial Intelligence: Risks to Privacy and Democracy. *Yale Journal of Law and Technology* .2019; 21:106-188. <https://ssrn.com/abstract=3273016>
18. Katsabian T. *Employees' Privacy in the Internet Age: Towards a New Procedural Approach*. *Berkeley Journal of Employment & Labor Law*. 2019;40 (2):203-255
19. Katyal S. Private Accountability in the Age of Artificial Intelligence. *University of California Law Rev*. 2019;66:54-141
20. Kerr I .Schrödinger’s Robot: Privacy in Uncertain States. *Theoretical Inquiries in Law*. 2019; 20(1):123-154

21. Koops B-J, Newell B, Skorvánek I. Location tracking by police: The regulation of “tireless and absolute surveillance. *UC Irvine Law Review*. 2019;9 (3): 635-698
22. Lei C. Legal Control over Big Data Criminal Investigation, *Social Sciences in China*.2019; 40(3):189-204. DOI: [10.1080/02529203.2019.1639963](https://doi.org/10.1080/02529203.2019.1639963)
23. Ligere E. Cyber clouds and silver linings? *Journal of International Banking Law and Regulation*. 2019; 34(3): 122-127
24. Lim D. AI & IP: innovation and creativity in an age of accelerated change. *Akron L. Rev.* 2019; 52(3):813-875
25. Maas M. International Law Does Not Compute: Artificial Intelligence and the Development, Displacement or Destruction of the Global Legal Order. *Melbourne Journal of International Law*. 2019; 20: 1-29
26. McDougall C. Autonomous weapon systems and accountability: Putting the cart before the horse. *Melbourne Journal of International Law*. 2019; 20(1), 58–87. <https://search.informit.org/doi/10.3316/informit.585304597979165>
27. McGregor L, Murray D, Vivian Ng. International Human Rights Law as a Framework for Algorithmic Accountability. *International and Comparative Law Quarterly*. 2019; 68(2), 309-343.
28. Papis-Almansa M. The Polish Clearing House System: A “Stir”ring example of the use of new technologies in ensuring VAT compliance in Poland and selected legal challenges. *EC Tax Review*. 2019; 28(1): 43-56.
29. Recupero PR. New Technologies, New Problems, New Laws. *J Am Acad Psychiatry Law*. 2016; 44:322–27
30. Ryan M. The Future of Transportation: Ethical, Legal, Social and Economic Impacts of Self-driving Vehicles in the Year 2025. *Sci Eng Ethics* 2020,26 :1185–1208 <https://doi.org/10.1007/s11948-019-00130-2>
31. Segura MS, Waisbord S. Between Data Capitalism and Data Citizenship. *Television & New Media*. 2019; 20(4):412-419. doi:10.1177/1527476419834519
32. Yu R, Ali G. What's Inside the Black Box? AI Challenges for Lawyers and Researchers. *Legal Information Management*, 2019; 19(1), 2-13.
33. Yu PK. Intellectual Property and Human Rights 2.0. *University of Richmond Law Review*. 2019; 53:1375-1453. Texas A&M University School of Law Legal Studies Research Paper No. 19-24, Available at SSRN: <https://ssrn.com/abstract=3394338>
34. Yoshikawa J. Sharing the Costs of Artificial Intelligence: Universal No-Fault Social Insurance for Personal Injuries. *Vanderbilt Journal of Entertainment and Technology Law*, 2019; 21(4), 1155–1187.
35. Schmitz AJ. Expanding Access to Remedies through E-Court Initiatives. *Buffalo Law Review*. 2019; 67(1):89-163
36. Shiner B. Big data, small law: how gaps in regulation are affecting political campaigning methods and the need for fundamental reform. *Public Law*.2019 ; 2:362-379
37. Schönberger D. Artificial intelligence in healthcare: a critical analysis of the legal and ethical implications, *International Journal of Law and Information Technology*. 2019; 27(2): 171–203, <https://doi.org/10.1093/ijlit/eaz004>
38. Sloan RH, Warner R. Algorithms and Human Freedom. *The Santa Clara High Technology Law Journal*.2019; 35(4):1-34

39. Basiri A, Mousazadeh R. *Industrial Robotic Systems & International Human Rights. Journal of Politics and Law*.2018; 11(1): 53-61. <https://doi.org/10.5539/jpl.v11n1p53>
40. Beduschi A. The Big Data of International Migration: Opportunities and Challenges for States under International Human Rights Law. *Georgetown Journal of International Law*. 2018;49 (4):981-1017 : <https://ssrn.com/abstract=3124199>
41. Berman E. A Government of Laws and Not of Machines *B.U. L.R.* 2018;98:1277-1355 <https://ssrn.com/abstract=3098995> or <http://dx.doi.org/10.2139/ssrn.3098995>
42. Bode I, Huelss H. Autonomous weapons systems and changing norms in international relations. *Review of International Studies*.2018; 44(3), 393-413. doi:10.1017/S0260210517000614
43. Bonadio E, McDonagh L, Arvidsson C. Intellectual Property Aspects of Robotics. *European Journal of Risk Regulation*. 2018; 9(4), 655-676. doi:10.1017/err.2018.58
44. Bornstein S. Antidiscriminatory Algorithms. *Alabama Law Review*. 2018; 70(2): 519-572
45. Cath, C. Governing artificial intelligence: ethical, legal and technical opportunities and challenges. *Philosophical Transactions of the Royal Society A*. 2018; 376. DOI:10.1098/rsta.2018.0080
46. Chakraborty S, Bhojwani R. Artificial intelligence and human rights: are they convergent or parallel to each other? *Novum Jus*.2018;12 (2 ): 13-38
47. Chehtman A. The *ad bellum* Challenge of Drones: Recalibrating Permissible Use of Force. *European Journal of International Law*. 2017;28(1):173–197, <https://doi.org/10.1093/ejil/chx001>
48. Crespi S. The Applicability of Schrems Principles to the Member States: National Security and Data Protection within the EU Context. *European law review*. 2018;5: 669-686
49. Coglianese C, Lehr D. Transparency and Algorithmic Governance. *Administrative Law Review*. 2018; 71 (1): 1-56
50. Cowgr Jr AR. Liability Considerations When Autonomous Vehicles Choose The Accident Victim. *Journal of High Technology Law*.2018; 19(1): 1-60.
51. Deeks AS. Predicting Enemies. *Virginia Law Review*.2018;104(8):1529-1592
52. Estlund C. *What Should We Do after Work: Automation and Employment. The Yale law journal*. 2018; 128 (2), 254-326. <https://digitalcommons.law.yale.edu/yli/vol128/iss2/1>
53. Figueroa A. *License to Kill: An Analysis of the Legality of Fully Autonomous Drones in the Context of International Use of Force Law*. *Pace International Law Review*.2018; 31: 145-171
54. Geiger, C. Freedom of Artistic Creativity and Copyright Law: A Compatible Combination? *UC Irvine Law Review*. 2018; 8(3):413-445.<https://ssrn.com/abstract=3053980>
55. Glennie-Smith C. Loopholes, Licensing, and Legislation: Considering the Needs of People with Disabilities in the Autonomous Vehicle Revolution. *Loyola of Los Angeles Entertainment Law Review*. 2018; 38(3):187-228
56. Harris K-K. *Drones: Proposed Standards of Liability. Santa Clara High Tech. L.J.*2018;35(1):65-109
57. Jacques S, Garstka K, Street J et al. Automated anti-piracy systems as copyright enforcement mechanism: a need to consider cultural diversity. *European intellectual property review*. 2018; 4(40):218-229
58. Jones ML. Silencing Bad Bots: Global, Legal and Political Questions for Mean Machine Communication. *Communication Law and Policy*. 2018;23(2):159-195, DOI: [10.1080/10811680.2018.1430418](https://doi.org/10.1080/10811680.2018.1430418)
59. Kornbluh K.The Internet’s Lost Promise and How America Can Restore It, *Foreign Affairs* 2018;97(5):33-38

60. Krupiy T. Regulating a Game Changer: Using a Distributed Approach to Develop an Accountability Framework for Lethal Autonomous Weapon Systems. *Georgetown Journal of International Law*. 2018; 50(1):45-112
61. Liu H-Y. Three Types of Structural Discrimination Introduced by Autonomous Vehicles. *UC Davis Law Review Online*. 2018; 51:149-180.
62. LoPucki LM. Algorithmic Entities. *Washington University Law Review*. 2018; 95(1):1-68
63. Malik S. *Autonomous Weapon Systems: The Possibility and Probability of Accountability Wisconsin International Law Journal* 2018, 35(3):609-642
64. Mokhtarian E. The Bot Legal Code: Developing a Legally Compliant Artificial Intelligence. *Vanderbilt Journal of Entertainment and Technology Law*. 2018; 21(1):145-208
65. Nemitz P. Constitutional democracy and technology in the age of artificial intelligence. *Phil. Trans. R. Soc.* 2018; A.3762018008920180089 <http://doi.org/10.1098/rsta.2018.008>
66. Pagallo U. Vital, Sophia et al. The Quest for the Legal Personhood of Robots. *Information* 2018; 9(230): 1-11. <https://doi.org/10.3390/info9090230>
67. Pasquale F, Cashwell G. Prediction, persuasion, and the jurisprudence of behaviourism. *University of Toronto Law Journal*. 2018; 68:63-81
68. Sarikakis K, Korbiel I, Piassaroli Mantovaneli W. Social control and the institutionalization of human rights as an ethical framework for media and ICT corporations. *Journal of Information, Communication and Ethics in Society*. 2018; 16(3): 275-289. <https://doi.org/10.1108/JICES-02-2018-0018>
69. Shakhrai SM. Digital Constitution: Fundamental Rights and Freedoms of an Individual in a totally Informational Society. *Her. Russ. Acad. Sci.* 2018; 88:441–447. <https://doi.org/10.1134/S1019331618060126>
70. Souza RR. Algorithms, Future and Digital Rights: Some Reflections. *Education for Information*. 2018 ;34(3): 179 – 183
71. Warren A, Hillas A. Lethal autonomous robotics: Rethinking the dehumanization of warfare. *UCLA J. Int'l L. Foreign Aff.* 2018; 22 (2):1-28
72. Wilner AS. Cybersecurity and its discontents: Artificial intelligence, the Internet of Things, and digital misinformation. *International Journal*. 2018; 73(2):308-316. doi:[10.1177/0020702018782496](https://doi.org/10.1177/0020702018782496)
73. Yakovleva S. Should Fundamental Rights to Privacy and Data Protection be a Part of the EU's International Trade 'Deals? *World Trade Review*. 2018; 17(3):477-508. doi:[10.1017/S1474745617000453](https://doi.org/10.1017/S1474745617000453)
74. Yemini M. The New Irony of Free Speech. *20 Columbia Science and Technology Law Review*. 2018; 20(119): 119-194 : <https://ssrn.com/abstract=3247735>
75. Chin A. Surgically Precise but Kinematically Abstract Patents. *Houston Law Review*. 2017; 55 (2):267-319
76. Costa-Cabral F, Lynskey O. Family ties: The intersection between data protection and competition in EU law. *Common Market Law Review*, 2017; 54(1)11-50. <https://kluwerlawonline.com/journalarticle/Common+Market+Law+Review/54.1/COLA2017002>
77. Filer T, Fredheim R. Popular with the Robots: Accusation and Automation in the Argentine Presidential Elections, 2015. *Int J Polit Cult Soc.* 2017; 30:259–274. <https://doi.org/10.1007/s10767-016-9233-7>

78. Guiora A. Accountability and Decision Making an Autonomous Warfare: Who Is Responsible. *Utah Law Review*. 2017; 2(2): 393-422
79. Houser KA, Sanders D. The use of big data analytics by the IRS: Efficient solutions or the end of privacy as we know it? *Vanderbilt Journal of Entertainment and Technology Law*. 2017; 19 (4):817-872
80. Heyns C. *Autonomous weapons in armed conflict and the right to a dignified life: an African perspective*, *South African Journal on Human Rights*.2017; 33(1): 46-71, [DOI: 10.1080/02587203.2017.1303903](https://doi.org/10.1080/02587203.2017.1303903)
81. Khoury AH. Intellectual Property Rights for "Hubots": On the Legal Implications of Human-Like Robots as Innovators and Creators. *Cardozo Arts & Entertainment Law Journal* .2017; 35 (3): 635-668.
82. Kinfe M Y. Digital privacy and virtues of multilateral digital constitutionalism—preliminary thoughts. *International Journal of Law and Information Technology*. 2017; 25(2): 115–138, <https://doi.org/10.1093/ijlit/eax001>
83. Kroll JA , Huey J , Barocas S , Felten EW , Reidenberg JR, Robinson DG , Yu H. *Accountable Algorithms*,165 *U. Pa. L. Rev.* 633 (2017). Available at: [https://scholarship.law.upenn.edu/penn\\_law\\_review/vol165/iss3/3](https://scholarship.law.upenn.edu/penn_law_review/vol165/iss3/3)
84. Press M. *Of Robots and Rules: Autonomous Weapon Systems in the Law of Armed Conflict* Georgetown Journal of International Law.2017;48:1337-1366
85. Robbins S., Henschke A. Designing for democracy: Bulk data and authoritarianism Surveillance and Society. 2017;15(3-4):582-589
86. Sarfaty G A. Can Big Data Revolutionize International Human Rights Law? *University of Pennsylvania Journal of International Law*.2017; 39(1): 73-101
87. Schuller AL. At the Crossroads of Control: The Intersection of Artificial Intelligence in Autonomous Weapon Systems with International Humanitarian Law. *Harvard National Security Journal*. 2017;8(2):379-425
88. Sussman R H. The reusable bomb: exploring how the law of armed conflict applies in cyberspace. *BU J. Sci.& Tech L*. 2017, 23: 481-521
89. Van den Hoven van Genderen R. Privacy and Data Protection in the Age of Pervasive Technologies in AI and Robotics. *European Data Protection Law Review* .2017; 3 (3):338-352
90. Yanisky-Ravid S. Generating Rembrandt: Artificial Intelligence, Copyright, and Accountability in the 3A Era — The Human-Like Authors Are Already Here — A New Model. *Michigan State Law Review*.2017 ;4:659-726
91. Yoo J. Embracing the Machines: Rationalist War and New Weapons Technologies. *California Law Review*.2017; 105(2):443-499. <http://www.jstor.org/stable/24915719>
92. Austin LM. Technological tattletales and constitutional black holes: communications intermediaries and constitutional constraints. *Theoretical Inquiries in Law*.2016;17(2): 451-485. <https://doi.org/10.1515/til-2016-0017>
93. Barocas S, Selbst A. Big Data's Disparate Impact. *California Law Review*. 2016;104(3):671-732. <http://www.jstor.org/stable/24758720>
94. Buchan R. Cyber Warfare and the Status of Anonymous under International Humanitarian Law, *Chinese Journal of International Law*. 2016; 15(4):41–772, <https://doi.org/10.1093/chinesejil/jmw041>

95. Chengeta T. Measuring Autonomous Weapon Systems against International Humanitarian Law Rules (2016) Vol 5 *Journal of Law and Cyber warfare* 2016, 5(1): 66-146
96. Chinen M A. The Co-Evolution of Autonomous Machines and Legal Responsibility .*Virginia Journal of Law & Technology*. 2016; 20(2), pp. 338-393
97. Drakopoulou S, Grossman W et al. The campaign for digital citizenship.*Soundings: A journal of politics and culture*, 2016; 62: 107-120. *Project MUSE* [muse.jhu.edu/article/615039](http://muse.jhu.edu/article/615039)
98. Drutman L, Yascha M. Will Robots Kill Democracy? *The National Interest*. 2016; 144: 18–31. *JSTOR*, [www.jstor.org/stable/26557319](http://www.jstor.org/stable/26557319).
99. Garcia D. Future arms, technologies, and international law: Preventive security governance. *European Journal of International Security*.2016; 1(1), 94-111. doi:10.1017/eis.2015.7
100. Gless S, Silverman E, Weigend T. If Robots Cause Harm, Who Is to Blame? Self-Driving Cars and Criminal Liability. *New Criminal Law Review*. 2016; 19(3):412-436  
<https://ssrn.com/abstract=2724592> or <http://dx.doi.org/10.2139/ssrn.2724592>
101. Haber E. Privatization of the Judiciary (February 20, 2016). 40 *Seattle U. L. Rev.* 2016; 40: 116-172. <https://ssrn.com/abstract=2765445>
102. Heyns C. Human Rights and the use of Autonomous Weapons Systems (AWS) During Domestic Law Enforcement. *Human Rights Quarterly*. 2016; 38(2):350-378. [doi:10.1353/hrq.2016.0034](https://doi.org/10.1353/hrq.2016.0034).
103. Heyns C, Akande D, Hill-Cawthorne L, Chengeta T.The International Law Framework Regulating the use of armed drones. *International and Comparative Law Quarterly*. 2016; 65(4):791-827. [Doi: 10.1017/S0020589316000385](https://doi.org/10.1017/S0020589316000385)
104. Littler M. Technology and the workplace: artificial intelligence and robots in the 21st century. *Employment and Industrial Relations Law*. 2016; 26(1): 1-5
105. Pomes E. Les systèmes d'armement létaux autonomes et le droit international humanitaire *Annuaire Français de Relations Internationales*. 2016;17 :244-258
106. Richemond-Barak D, Feinberg A. The Irony of the Iron Dome: Intelligent Defense Systems, Law, and Security. *Harvard National Security Journal*. 2016; 7: 469- 524.  
<https://ssrn.com/abstract=2685858>
107. Roth AL. Trial by Machine. *Georgetown Law Journal*.2016; 104(5):1-48
108. Terry NP. Will the Internet of Things Disrupt Healthcare? *Vanderbilt Journal of Entertainment & Technology Law*.2016;19(2):327-353.<http://dx.doi.org/10.2139/ssrn.2760447>
109. Al-Saggaf Y. The Use of Data Mining by Private Health Insurance Companies and Customers' Privacy: An Ethical Analysis. *Cambridge Quarterly of Healthcare Ethics*, 2015; 24(3): 281-292. Doi: [10.1017/S0963180114000607](https://doi.org/10.1017/S0963180114000607)
110. Ashrafian H. Alon AI: A Humanitarian Law of Artificial Intelligence and Robotics. *SciEng Ethics*. 2015; 21: 29–40. <https://doi.org/10.1007/s11948-013-9513-9>
111. Bennett CJ.Trends in Voter Surveillance in Western Societies: Privacy Intrusions and Democratic Implications. *Surveillance and Society*. 2015; 13 (3-4):370-384
112. Boeglin J. *The Costs of Self-Driving Cars: Reconciling Freedom and Privacy with Tort Liability in Autonomous Vehicle Regulation*. *Yale Journal of Law and Technology*. 2015; 17(1):171- 203
113. Cass K. Autonomous Weapons and Accountability: Seeking Solutions in the Law of War. *Loyola of Los Angeles Law Review* .2015; 48(3):1049–53
114. Crootof R. The Killer Robots Are Here: Legal and Policy Implications. *Cardozo L. Rev.* 2015; 36:1837-1915 <https://ssrn.com/abstract=2534567> <http://dx.doi.org/10.2139/ssrn.3098995> .

115. DeSon JS. Automating the right stuff? The hidden ramifications of ensuring autonomous aerial weapon systems comply with International Humanitarian Law. *Air Force Law Review* 2015; 72: 85-122.
116. Garcia D. Killer Robots: Why the US should lead the Ban. *Global Policy*.2015; 6(1):57- 63
117. Harkness SD. Bridging the Uncompensated Caregiver Gap: Does Technology Provide an Ethically and Legally Viable Answer? *Elder Law Journal*. 2015; 22(2): 399-448
118. Jensen E. *Future War and the War Powers Resolution*. Emory International Law Review 2015; 29 (3):499-555
119. Joyce D. Internet Freedom and Human Rights. *European Journal of international Law*. 2015; 26(2): 493-514. <https://doi.org/10.1093/ejil/chv021>
120. KrupiyT. Of Souls, Spirits and Ghosts: Transposing the Application of the Rules of Targeting to Lethal Autonomous Robots. *Melbourne Journal of International Law*. 2015; 16(1): 1-58
121. Paust JJ. Can You Hear Me Now?: Private Communication, National Security, and the Human Rights Disconnect," *Chicago Journal of International Law*.2015; 15(2):612-651
122. Reitinger N. Algorithmic Choice and Superior Responsibility: Closing the Gap between Liability and Lethal Autonomy by Defining the Line between Actors and Tools. *Gonzaga Law Review*. 2015; 51 (1):79-119
123. Tibori-Szabó K. Self-Defence and the United States Policy on Drone Strikes, *Journal of Conflict and Security Law*.2015; 20(3): 381–413, <https://doi.org/10.1093/jcsl/krv006>
124. Williams J. *Democracy and Regulating Autonomous Weapons: Biting the Bullet while missing the point? Global Policy*.2015; 6(3): 179-189
125. Beard J M. Autonomous Weapons and Human Responsibilities. *Georgetown Journal of International Law*. 2014; 45:617-681. <https://ssrn.com/abstract=2447968>
126. Bills G. LAWS unto Themselves: Controlling the Development and Use of Lethal Autonomous Weapons Systems. *The George Washington law review*.2014; 83(1):176-208
127. Brown I, Korff D. Foreign surveillance: law and practice in a global digital environment. *European Human Rights Law Review*.2014; (3):243–251.
128. Bryant WS. Automated Vehicles Are Probably Legal in the United States. *Texas A&M Law review*.2014; 1: 412-521
129. Keats DC, Pasquale FA. The Scored Society: Due Process for Automated Predictions *Washington Law Review*. 2014; 89 (1): 1-33. <https://ssrn.com/abstract=2376209>
130. Pejic J. Extraterritorial targeting by means of armed drones: Some legal Implications. *International Review of the Red Cross*.2014; 96(893):67-106. [doi:10.1017/S1816383114000447](https://doi.org/10.1017/S1816383114000447)
131. Robertson J. *Human Rights Vs Robot Rights: Forecasts from Japan*. *Critical Asian Studies*.2014; 46(4):571-598. [DOI: 10.1080/14672715.2014.960707](https://doi.org/10.1080/14672715.2014.960707)
132. Rogers L. Legal Judgment Day for the Rise of the Machines: A National Approach to Regulating Fully Autonomous Weapons. *Arizona Law Review*. 2014; 56(4): 1258-127: <https://ssrn.com/abstract=2823541>
133. Sarfaraz H. Surveillance, Privacy and Cyber Law. *Computer and Telecommunication Law Review*.2014; 20(7): 189-194, <https://ssrn.com/abstract=3125116>
134. Steven J. The right to privacy catches up with search engines: the unforgettable decision in Google Spain v AEPD .*Computer and Telecommunications Law Review* .2014; 20 (5): 130-134

135. Leander A. Technological Agency in the Co-Constitution of Legal Expertise and the US Drone Program. *Leiden Journal of International Law*. 2013; 26(4):811-831. [Doi: 10.1017/S0922156513000423](https://doi.org/10.1017/S0922156513000423)
136. Mac Síthigh D. App law within: rights and regulation in the smartphone age, *International Journal of Law and Information Technology*. 2013; 21 (2): 154– 186, <https://doi.org/10.1093/ijlit/eat002>
137. Opperbeck DW. Drone Courts. *Rutgers LJ*. 2013, 44 :456–57
138. Zarsky TZ. *Transparent Predictions*. *University of Illinois Law Review*. 2013, 4:1503-1569
139. Asaro P. On banning autonomous weapon systems: human rights, automation, and the dehumanization of lethal decision-making. *International Review of the Red Cross*. 2012; 94:687-709
140. Bhatt C. Human Rights and the Transformations of War. *Sociology*. 2012; 46(5):813-828. Doi: 10.1177/0038038512450102
141. Casey-Maslen S. Pandora's box? Drone strikes under jus ad bellum, jus in bello, and international human rights law. *International Review of the Red Cross*. 2012; 94(886), 597-625. doi: 10.1017/S1816383113000118
142. Liu H-Y. Categorization and Legality of Autonomous and Remote Weapons Systems. *International Review of the Red Cross*. 2012; 96(886), 627-652
143. Sauer F, Schörnig N. Killer drones: The 'silver bullet' of democratic warfare? *Security Dialogue*. 2012; 43(4):363-380. doi:[10.1177/0967010612450207](https://doi.org/10.1177/0967010612450207)
144. Trimble M. The Future of Cybertravel: Legal Implications of the Evasion of Geolocation. *Fordham Intellectual Property, Media & Entertainment Law Journal*. 2012; 22:567-657
145. Alston P. The CIA and Targeted Killings beyond Borders. *Harvard National Security Journal*. 2011; 2:284-446
146. Gao H. Google's China Problem: A Case Study on Trade, Technology and Human Rights under the GATS. *Asian Journal of WTO International Health and Law Policy*. 2011; 6:347-385
147. Hubbard FP. Do Androids Dream? Personhood and Intelligent Artifacts, 83 *Temp. L. Rev.* 2011; 83: 405 -474
148. Wilson N. E-risks and insurance in the information age. *New Zealand Universities Law Review*. 2011; 24(4):550-573
149. Zarsky TZ. *Governmental Data Mining and its Alternatives*. *Penn State Law Review*. 2011 ; 166(2) :285-330
150. Sarkar SP, Adshead G. Whose DNA is it anyway? European court, junk DNA, and the problem with prediction. *The Journal of the American Academy of Psychiatry and the Law*. 2010; 38(2):247-250
151. Wang M. Information privacy in a network society: decision making amidst constant change. *National Taiwan University Law Review*. 2010; 5: 127–154
152. Gunasekara G. The "Final" Privacy Frontier? Regulating Trans-Border Data Flows, *International Journal of Law and Information Technology*. 2009; 17(2):147–179, <https://doi.org/10.1093/ijlit/eam004>
153. Wei-Ming S C. Canadian Copyright Reform — "User Rights" in the Digital Era 67 *University of Toronto Faculty Law Review*. 2009; 235: 246
154. Penney S. Reasonable Expectations of Privacy and Novel Search Technologies: An Economic Approach. *The Journal of Criminal Law and Criminology (1973-)*. 2007; 97(2): 477-529.



155. Tavani HT. Genomic Research and Data-Mining Technology: Implications for Personal Privacy and Informed Consent. *Ethics and Information Technology* 2004; 6:15–28  
<https://doi.org/10.1023/B:ETIN.0000036156.77169.31>
156. Zarsky TZ. 'Mine Your Own Business!': Making the Case for the Implications of Data Mining of Personal Information in the Forum of Public Opinion. *Yale J Law Technol.*2003; 5(1):17-47
157. Norman EFJr. Prejudice, segregation and immigration laws —integration of the robot into the laboratory society. *Journal of Analytical Methods in Chemistry.*1994; 16(4): 139-141.  
<https://doi.org/10.1155/S1463924694000155>
